# Supplementary material for: Enhanced performance of perovskite solar cells by strengthening a self-embedded solvent annealing effect in perovskite precursor films
Source: Royal Society of Chemistry journal article supplement (doi:10.1039/c7ra10294a), 2017-01-01
Supplement: c7ra10294a1.pdf [file c7ra10294a1.pdf]

## Supporting Information

# **Enhanced performance of perovskite solar cells by strengthening self-embedded solvent annealing effect in perovskite precursor film**

Xiaobing Cao<sup>1</sup>, Lili Zhi<sup>2</sup>, Yahui Li<sup>1</sup>, Xian Cui<sup>1</sup>, Lijie Ci<sup>2</sup>, Kongxian Ding<sup>3</sup>, Jinquan Wei<sup>1\*</sup>

1. State Key Lab of New Ceramic and Fine Processing, School of Materials Science and Engineering, Tsinghua University, Beijing 100084, P.R. China
2. School of Materials Science & Engineering, Shandong University, Jinan 250061, Shandong, P.R. China
3. Shenzhen Jiawei Solar Lighting Co., Ltd., New Industrial Zone No. 1-4, Fuping Road, Longgang District, Shenzhen 518112, Guangdong, P.R. China

\*E-mail: jqwei@tsinghua.edu.cn

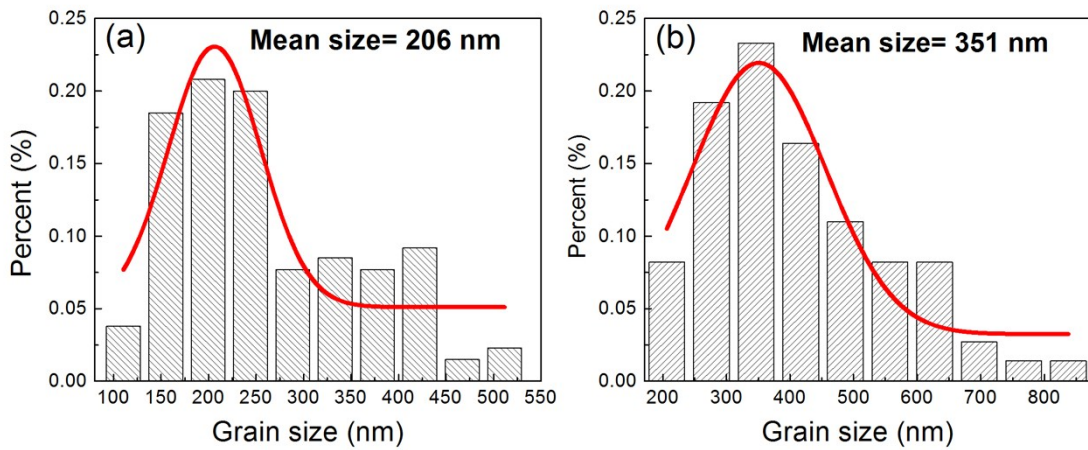

**Figure S1** The distribution of grains size of the perovskite film fabricated from different annealing approaches. (a) Without protective layer, (b) with protective layer. All results are collected from SEM images using Nano measurer 1.2 software.

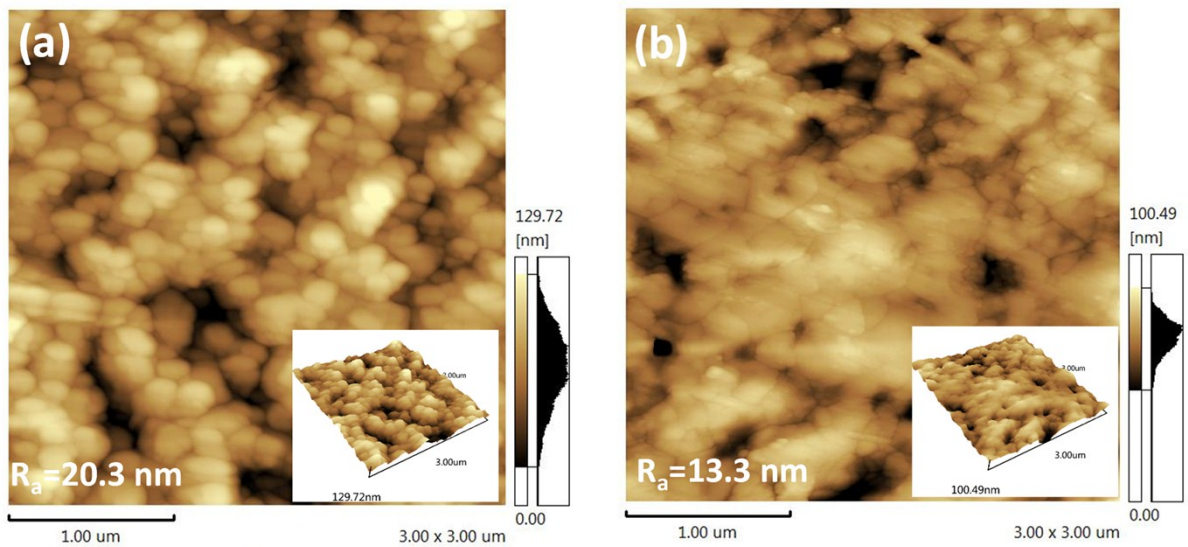

**Figure S2** AFM images of perovskite film fabricated from different annealing approaches. (a) without a protective layer, (b) with a protective layer.

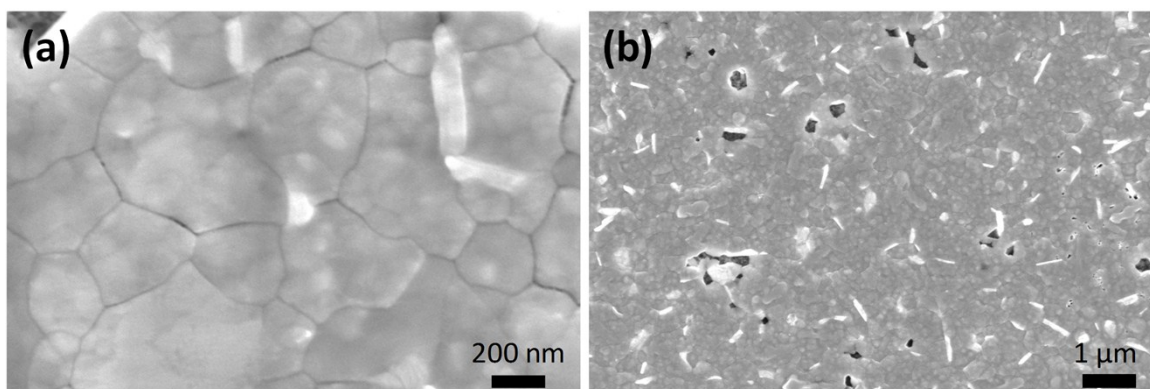

**Figure S3** High (a) and low(b) magnification SEM images of perovskite fabricated from optimized DMSO in  $\text{PbI}_2/\text{DMF}$  solutions by employing  $\text{PC}_{61}\text{BM}$  as protective layer.

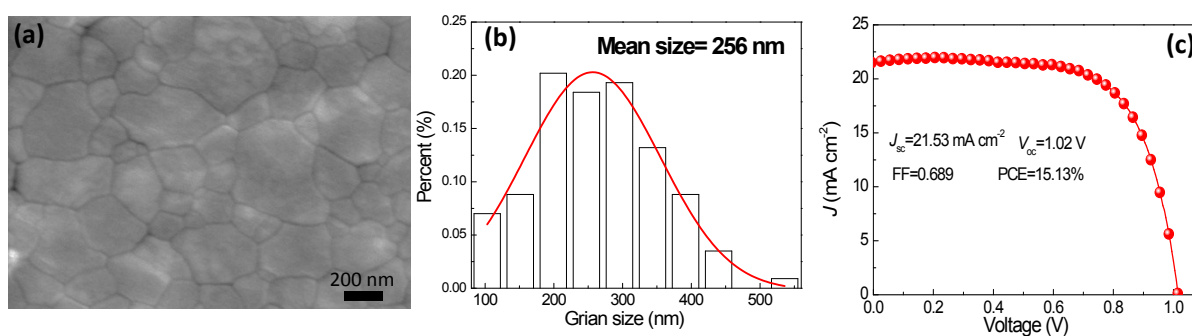

**Figure S4** (a) SEM images of perovskite film by employing Spiro-OMeTAD as protective layer. (b) The distribution of grains size of the corresponding perovskite film. (c)  $J$ - $V$  curves of the best solar cells by employing Spiro-OMeTAD as protective layer.

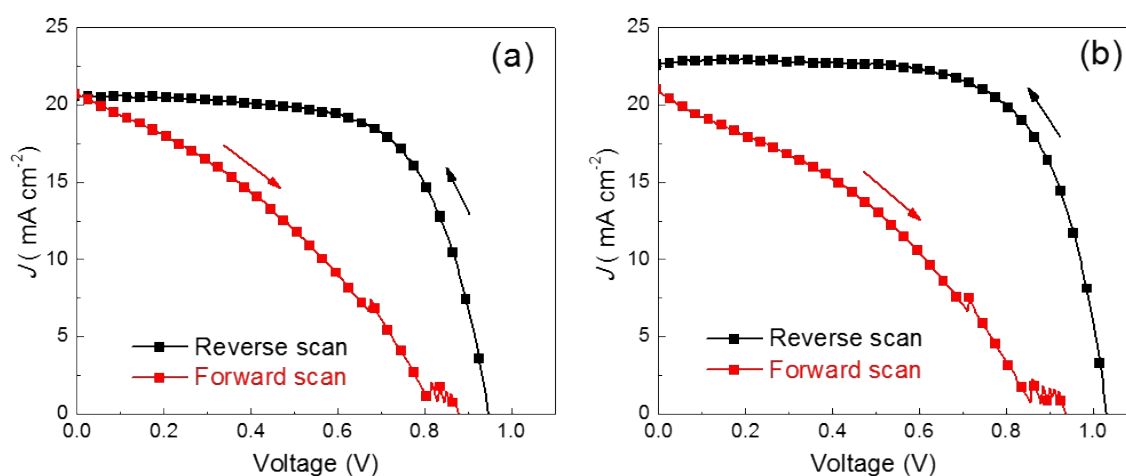

**Figure S5** Typical hysteresis behavior of the PSCs. (a) without protective layer, (b) with protective layer. There is obvious discrepancy between reverse scan (dark line) and forward scan (red line).
